# Supplementary material
Source: publisher figshare collection journal article supplement (https://acs.figshare.com/ndownloader/files/5137837)
Supplement: Supplementary file 1 [file 5137837]

# **Assembly of Hydrogen Bonded Diamondoid networks Based on Synthetic Metal-Organic Tetrahedral Nodes**

**Bao-Qing Ma,\* Hao-Ling Sun and Song Gao\***

## **Supporting materials**

### **SHG setups:**

SGH experiment: the experimental set up included a high-power mode-locked Nd-YAG laser system with a selected wavelength of 1064 nm as incident beam. The laser beam is split into two parts: one to generate the second harmonic signal in the sample and the other to generate the second harmonic signal in the reference KDP powder.

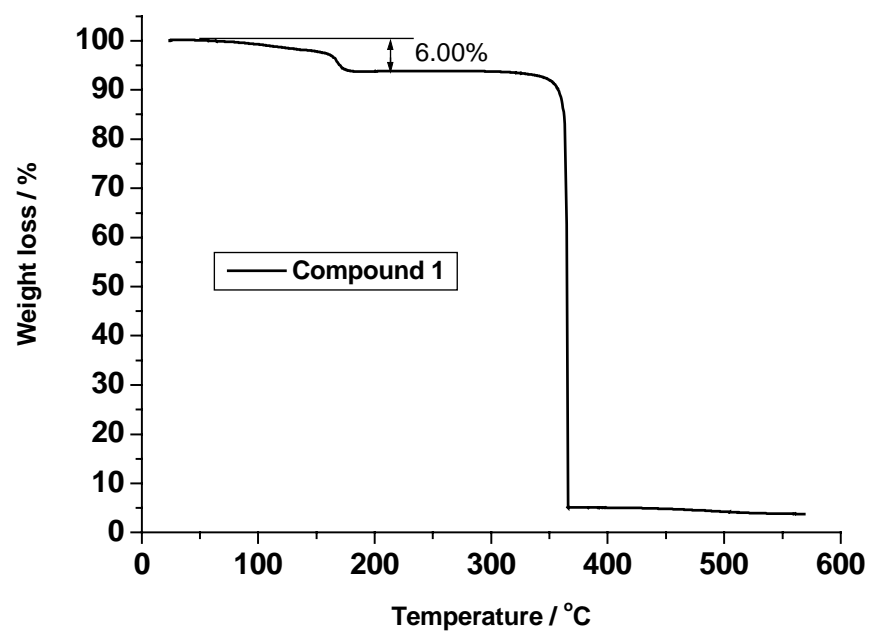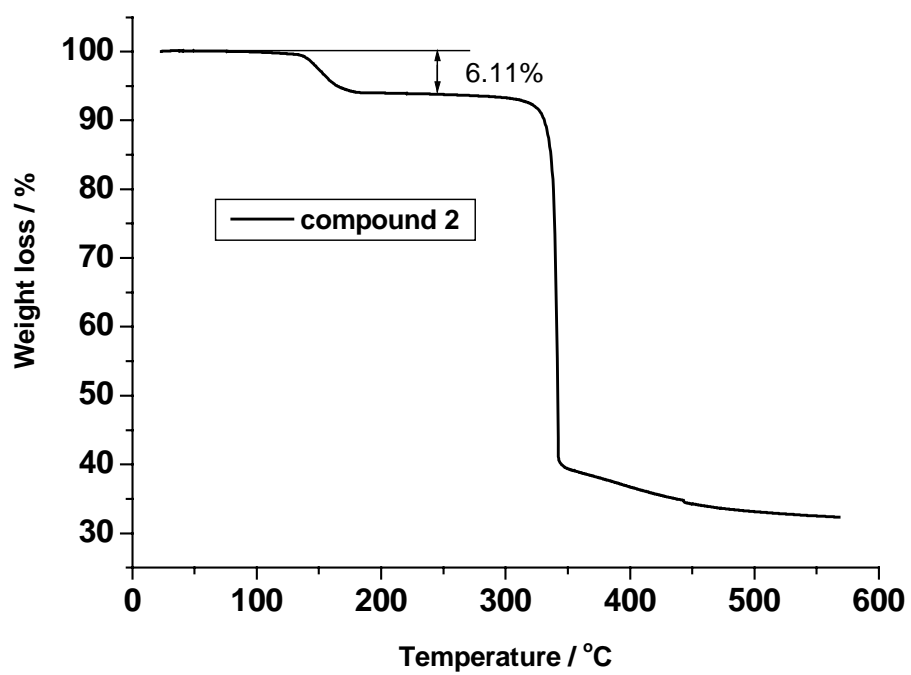

Fig. S1. Thermogravimetric Curve for compounds 1 and 2.

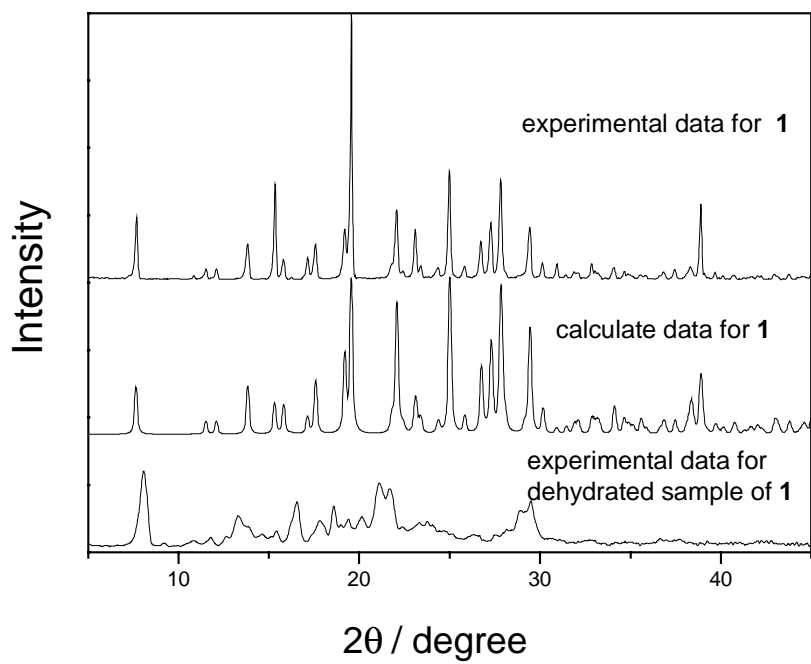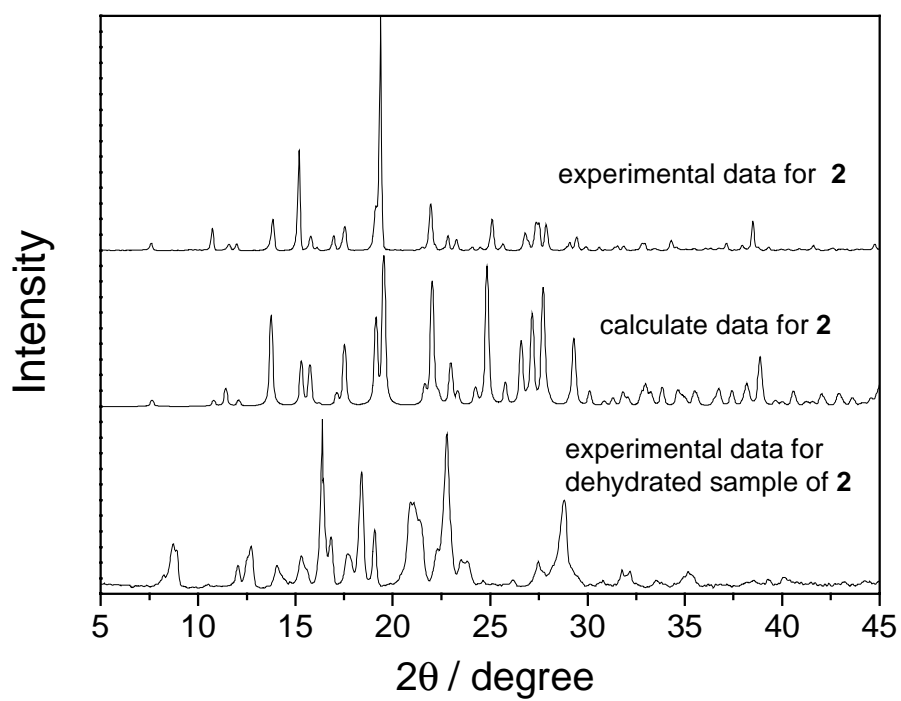

**Fig. S2. XRPD patterns for compounds 1 and 2.**
